# Supplementary material for: Time to achieve blood pressure control and its predictors among hypertensive patients treated at public hospitals in Afar region, North-Eastern Ethiopia: A retrospective cohort study
Source: Research Square preprint supplement (doi:10.21203/rs.3.rs-5643741/v1), 2024-12-24
Supplement: Supplementary file 1 [file 0bda9b155b2cd10d2872fae2.docx]

# S1: Information abstraction form/questionnaire

Title: time to achieve blood pressure control and its predictors among hypertensive patients treated at public hospitals in Afar region, North-Eastern Ethiopia, Northeastern Ethiopia

Date of data collection___________________________________________________________

Data collector___________________________Signature________________________________

Supervisor______________________________Signature_______________________________

| **1. demographic Characteristics** | | | | | | **Skip** |
| --- | --- | --- | --- | --- | --- | --- |
| 1 | Patient ID (MRN) | | |  | |  |
| 2 | Sex | | | 1. Male 2. Female | |  |
| 3 | Age in years | | | _______________________ | |  |
| 4 | Residency | | | 1. Urban 2. Rural | |  |
| **2. Clinical factors** | | | | | |  |
| 5 | | Date of hypertension diagnosis (dd/mm/yy) | | __________________________________ | |  |
| 6 | | Date of antihypertensive drug initiation (dd/mm/yy) | | _____________________________________ | |  |
| 7 | | Follow-up outcome | | 1. BP controlled 2. Censored (uncontrolled, TO, death) | If censored, skip to Q9 | |
| 8 | | If controlled (BP) | | Date:_________  SBP:__________  DBP:____________ |  | |
| 9 | | If censored (TO, Death, LTF and study end) | | Date: ____________________________ |  | |
| 10 | | Base line blood pressure (hypertension stage) | | 1. Mild HTN BP:_____________ 2. Severe HTN BP:_____________ |  | |
| 11 | | Does patient has the comorbid disease/s? | | 1. Yes 2. No | If no, skip to Q13 | |
| 12 | | If yes to question number 12, state the comorbid disease/s | | 1. DM 2. Asthma 3. Other chronic respiratory diseases 4. Malignancies 5. HIV/AIDS 6. Liver disease 7. Others (specify)________________ |  | |
| 13 | | Does patient has hypertensive complication/s? | | 1. Yes 2. No | If no, skip to Q15 | |
| 14 | | If yes to question number 14, state complication /s | | 1. Heart diseases 2. stroke 3. renal disease 4. Ocular disease 5. Others (specify)_______________ |  | |
| **3. Drug and therapy related factors** | | | | |  | |
| 15 | | Drug Therapy | 1. Monotherapy 2. Combination therapy | | If monotherapy skip to Q17 | |
| 16 | | If monotherapy (class) | 1. CCBs­­­­­­­­­­­­­________________ 2. Diuretics______________ 3. ACE inhibitors ___________ 4. Beta-blockers__________ 5. ARB_________________ | |  | |
| 17 | | If combination therapy | 1. CCBs with diuretics 2. CCBs with ARB-blocker:__________ 3. ACE inhibitor with diuretics:________ 4. CCBs with ACE Inhibitor:_________ 5. ARBs with diuretics:_____________ 6. Others (specify):__________________ | |  | |
| 19 | | Treatment intensification | A. yes  B. No | |  | |
| 20 | | Switch of drugs | 1. Yes 2. No | |  | |
| 21 | | Prescription pattern | 1. Once per day 2. Twice per day 3. Three times per day | |  | |
| 22 | | Other concomitant therapy | 1. Yes 2. No | |  | |
| 23 | | Follow up schedule | 1. Monthly 2. Every two month 3. Every three month 4. Other (Specify)_________________ | |  | |
| 24 | | Statin Therapy | 1. Yes 2. No | |  | |
| **Behavioral characteristics** | | | | |  | |
| 25 | Tobacco smoking | | 1. Yes 2. No | |  | |
| 26 | Alcohol use | | 1. Yes 2. No | |  | |
| **Laboratory** | | | | |  | |
| 37 | Serum creatinine | | ___________________________________ | |  | |
| 38 | Fasting blood sugar | | ___________________________________ | |  | |
