# Supplementary material for: Time to achieve blood pressure control and its predictors among hypertensive patients treated at public hospitals in Afar region, North-Eastern Ethiopia: A retrospective cohort study
Source: Research Square preprint supplement (doi:10.21203/rs.3.rs-5643741/v1), 2024-12-24
Supplement: Supplementary file 2 [file 89efd63ced9017cbbc63bc53.docx]

| Covariates | N=410 | |
| --- | --- | --- |
| Missing value (%) | Missed data handling method |
| Other concomitant therapy | 37 (9%) | Accepted by modal imputation |
| Statin therapy | 34 (8.3%) | Accepted by modal imputation |
| Smoking | 35 (8.5%) | Accepted by modal imputation |
| Alcohol use | 39 (9.5%) | Accepted by modal imputation |
| Creatinine | 38(9.3%) | Accepted by median imputation |
| FBS | 22 (5.4%) | Accepted by median imputation |
