# Supplementary material for: Time to achieve blood pressure control and its predictors among hypertensive patients treated at public hospitals in Afar region, North-Eastern Ethiopia: A retrospective cohort study
Source: Research Square preprint supplement (doi:10.21203/rs.3.rs-5643741/v1), 2024-12-24
Supplement: Supplementary file 3 [file cecc0333bebba2a8137150f9.docx]

| Months | Cumulative Failure  (BP control) |
| --- | --- |
| 3 | 0.24% |
| 6 | 22.15% |
| 12 | 48.31%, |
| 24 | 64.1% |
| 36 . | 69.5%, |
