# Supplementary material for: Time to achieve blood pressure control and its predictors among hypertensive patients treated at public hospitals in Afar region, North-Eastern Ethiopia: A retrospective cohort study
Source: Research Square preprint supplement (doi:10.21203/rs.3.rs-5643741/v1), 2024-12-24
Supplement: Supplementary file 4 [file e5aaa344f7691514113421bb.docx]

| Rho | rho | chi2 | df | P-value |
| --- | --- | --- | --- | --- |
|  |  |  |  |  |
| Sex | 0.05125 | 0.71 | 1 | 0.3985 |
| Age | -0.01375 | 0.05 | 1 | 0.8279 |
| Residency | -0.01210 | 0.04 | 1 | 0.8492 |
| Baseline BP | -0.06682 | 1.13 | 1 | 0.2883 |
| comorbidities | 0.01733 | 0.05 | 1 | 0.8152 |
| complications | 0.00494 | 0.00 | 1 | 0.9448 |
| Prescription pattern | 0.02262 | 0.13 | 1 | 0.7187 |
| Drug therapy | 0.11255 | 3.11 | 1 | 0.0780 |
| Treatment intensification | 0.02838 | 0.18 | 1 | 0.6687 |
| Drug switching | 0.04741 | 0.53 | 1 | 0.4659 |
| Appointment schedule | 0.00899 | 0.02 | 1 | 0.8892 |
| Statin therapy | 0.01785 | 0.08 | 1 | 0.7773 |
| Creatinine | 0.07803 | 1.47 | 1 | 0.2247 |
| FBS | 0.10499 | 2.18 | 1 | 0.1402 |
| global test |  | 14.99 | 14 | 0.3791 |
